# Supplementary material for: Template-controlled synthesis of a planar [16]ane-P2CNHC2macrocycle
Source: Royal Society of Chemistry journal article supplement (doi:10.1039/b920474a), 2009-11-28
Supplement: b920474a.pdf [file b920474a.pdf]

# Template-controlled synthesis of a planar [16]ane- $P_2C^{NHC}_2$ macrocycle

Aarón Flores-Figueroa, Tania Pape, Kai-Oliver Feldmann, and F. Ekkehardt Hahn\*

Institut für Anorganische und Analytische Chemie, Westfälische Wilhelms-Universität  
Münster, Corrensstrasse 30, D-48149 Münster, Germany

## Supplementary Information

**General:** All preparations were carried out under an argon atmosphere using conventional Schlenk techniques. Methanol was dried over  $CaH_2$  under argon and was freshly distilled prior to use. Dry DMF and phenyldivinylphosphine (PVP) were purchased from Aldrich. Complexes  $[Pt(PMe_3)_4]Cl_2$ ,<sup>1</sup>  $[Pt(PMe_2Ph)_4](PF_6)_2$ ,<sup>2</sup>  $[Pt(PMe_2Ph)_4](PF_6)_2$ <sup>2</sup> and 2-azidoethyl isocyanide<sup>3</sup> were prepared following published procedures. NMR spectra were recorded with a Bruker Avance I 400 NMR spectrometer. IR spectra were measured with a Bruker Vector 22 spectrometer. Electrospray mass spectra were obtained with a Bruker Daltonics Micro Tof (ESI-MS) spectrometer.

**General procedure for the preparation of compounds  $6(Cl)_2$ – $6(PF_6)_2$ :** A sample of a platinum tetrakisphosphine complex  $[Pt(PR_3)_4]X_2$  was dissolved in methanol. The appropriate amount of 2-azidoethyl isocyanide in methanol was slowly added via a dropping funnel over the period of 6 h. After complete addition the solution was stirred at ambient temperature for 4 h. The volume of the solution was reduced to about 7 mL and  $Et_2O$  (20 mL) was added. This mixture was cooled to  $-20\text{ }^\circ\text{C}$  for 24 h after which the complexes  $6(Cl)_2$ – $6(PF_6)_2$  crystallized and were collected by filtration. The platinum dicarbene complexes are white solids which are stable in air.

**6a(Cl)<sub>2</sub>**: Synthesized from 258 mg (0.45 mmol, 1.0 eq) of [Pt(PMe<sub>3</sub>)<sub>4</sub>]Cl<sub>2</sub> dissolved in 20 mL of methanol and 96 mg (0.99 mmol, 2.2 eq) of **3** dissolved in 40 mL of methanol. Yield: 164 mg (0.29 mmol, 65%). <sup>1</sup>H (400 MHz, CD<sub>3</sub>OD): δ = 4.86 (s br, 4H, NH), 3.72 (s, 8H, CH<sub>2</sub>), 1.58 (t, <sup>2</sup>J<sub>P,H</sub> = 4.1 Hz, Pt satellites <sup>3</sup>J<sub>Pt,H</sub> = 31.6 Hz, PMe<sub>3</sub>); <sup>13</sup>C{<sup>1</sup>H} (100 MHz, CD<sub>3</sub>OD): δ = 191.8 (t, <sup>2</sup>J<sub>P,C</sub> = 10.6 Hz, NCN), 45.4 (s, Pt satellites <sup>3</sup>J<sub>Pt,C</sub> = 36.8 Hz, CH<sub>2</sub>), 14.1 (t, <sup>1</sup>J<sub>P,C</sub> = 20.0 Hz, PMe<sub>3</sub>); <sup>31</sup>P{<sup>1</sup>H} (162 MHz, CD<sub>3</sub>OD): δ = -19.7 (s, Pt satellites <sup>1</sup>J<sub>Pt,P</sub> = 2262 Hz, PMe<sub>3</sub>); MS (ESI): *m/z* (%) 486 (24, [**6a**-H]<sup>+</sup>), 243 (100, [**6a**]<sup>2+</sup>).

**6b(PF<sub>6</sub>)<sub>2</sub>**: Synthesized from 1.24 g (1.19 mmol, 1.0 eq) of [Pt(PMe<sub>2</sub>Ph)<sub>4</sub>](PF<sub>6</sub>)<sub>2</sub> dissolved in 70 mL of methanol and 0.24 g (2.50 mmol, 2.1 eq) of **3** dissolved in 50 mL of methanol. Yield: 752 mg (0.83 mmol, 70%). <sup>1</sup>H (400 MHz, DMSO-*d*<sub>6</sub>): δ = 8.56 (s br, 4H, Ph), 7.55–7.47 (m, 6H, Ph), 3.38 (s br, 4H, NH), 3.20 (s, 8H, CH<sub>2</sub>), 1.91–1.75 (m, 12H, PMe<sub>2</sub>); <sup>13</sup>C{<sup>1</sup>H} (100 MHz, DMSO-*d*<sub>6</sub>): δ = 188.8 (t, <sup>2</sup>J<sub>P,C</sub> = 10.6 Hz, NCN), 131.5 (t, <sup>1</sup>J<sub>P,C</sub> = 29.4 Hz, PPh), 130.7, 130.5 (t, <sup>2</sup>J<sub>P,C</sub> = 5.8 Hz, PPh), 128.5 (t, <sup>3</sup>J<sub>P,C</sub> = 5.3 Hz, PPh), 43.6 (s, CH<sub>2</sub>), 12.2 (t, <sup>1</sup>J<sub>P,C</sub> = 19.6 Hz, PMe<sub>2</sub>); <sup>31</sup>P{<sup>1</sup>H} (162 MHz, DMSO-*d*<sub>6</sub>): δ = -10.0 (s, Pt satellites <sup>1</sup>J<sub>Pt,P</sub> = 2311 Hz, PMe<sub>2</sub>Ph), -144.2 (sept, PF<sub>6</sub>); MS (ESI): *m/z* (%) 756 (13, [**6b**+PF<sub>6</sub>]<sup>+</sup>), 610 (5, [**6b**-H]<sup>+</sup>), 305 (100, [**6b**]<sup>2+</sup>).

**6c(PF<sub>6</sub>)<sub>2</sub>**: Synthesized from 400 mg (0.31 mmol, 1.0 eq) of [Pt(PMePh<sub>2</sub>)<sub>4</sub>](PF<sub>6</sub>)<sub>2</sub> dissolved in 60 mL of methanol and 63 mg (0.65 mmol, 2.1 eq) of **3** dissolved in 60 mL of methanol. Yield: 236 mg (0.23 mmol, 74%). <sup>1</sup>H (400 MHz, DMSO-*d*<sub>6</sub>): δ = 8.54 (s br, 4H, Ph), 7.57–7.46 (m, 16H, Ph), 3.37 (s br, 4H, NH), 2.69 (s, 8H, CH<sub>2</sub>), 2.42–2.25 (m, 6H, PMe); <sup>13</sup>C{<sup>1</sup>H} (100 MHz, DMSO-*d*<sub>6</sub>): δ = 189.2 (t, <sup>2</sup>J<sub>P,C</sub> = 10.3 Hz, NCN), 132.2 (t, <sup>2</sup>J<sub>P,C</sub> = 6.2 Hz, PPh<sub>2</sub>), 131.4 (m, PPh<sub>2</sub>), 130.9 (PPh<sub>2</sub>), 128.4 (t, <sup>2</sup>J<sub>P,C</sub> = 5.3 Hz, PPh<sub>2</sub>), 43.3 (s, Pt satellites <sup>3</sup>J<sub>Pt,C</sub> = 32.2 Hz, CH<sub>2</sub>), 11.1 (t, <sup>1</sup>J<sub>P,C</sub> = 19.2 Hz, PMe); <sup>31</sup>P{<sup>1</sup>H} (162 MHz, DMSO-*d*<sub>6</sub>): δ = -0.07 (s, Pt satellites <sup>1</sup>J<sub>Pt,P</sub> = 2510 Hz, PMePh<sub>2</sub>), -144.2 (sept, PF<sub>6</sub>); MS (ESI): *m/z* (%) 880 (7, [**6c**+PF<sub>6</sub>]<sup>+</sup>), 734 (3, [**6c**-H]<sup>+</sup>), 367 (100, [**6c**]<sup>2+</sup>).

**1(PF<sub>6</sub>)<sub>2</sub>**: A solution of 100 mg (0.11 mmol, 1.0 eq) of **6b**(PF<sub>6</sub>)<sub>2</sub> and 72 mg (0.44 mmol, 4

eq) of phenyldivinylphosphine in 5 mL of DMF were heated to 85 °C for 2 d in a Schlenk tube fitted with a bubbler. Subsequently, the DMF was removed at 40 °C under reduced pressure and the resulting solid was suspended in 5 mL of MeOH (sonic bath). Compound **1**(PF<sub>6</sub>)<sub>2</sub> was isolated by filtration and dried under reduced pressure. The solid obtained was washed one more time with MeOH and again dried under reduced pressure. Compound **1**(PF<sub>6</sub>)<sub>2</sub> can also be obtained from **6c**(PF<sub>6</sub>)<sub>2</sub> under similar conditions at a reaction temperature of 70 °C, but the lower boiling point of PMe<sub>2</sub>Ph makes the isolation of **1**(PF<sub>6</sub>)<sub>2</sub> starting from **6b**(PF<sub>6</sub>)<sub>2</sub> easier. Yield: 95 mg (0.99 mmol, 90%) starting from **6c**(PF<sub>6</sub>)<sub>2</sub>. <sup>1</sup>H (400 MHz, DMSO-*d*<sub>6</sub>): δ = 7.97–7.52 (m, 10H, Ph), 4.02–3.81 (m, 4H, NCHHCHHN), 3.97–3.62 (m, 8H, NCH<sub>2</sub>CH<sub>2</sub>P), 3.75–3.55 (m, 4H, NCHHCHHN), 3.21–2.97 (m, 4H, NCH<sub>2</sub>CHHP), 2.67–2.45 (m, 4H, NCH<sub>2</sub>CHHP); <sup>13</sup>C{<sup>1</sup>H} (100 MHz, DMSO-*d*<sub>6</sub>): δ = 180.2 (t, <sup>2</sup>J<sub>P,C</sub> = 9.4 Hz, NCN), 132.9, 132.1, 129.7, 129.4 (PPh), 51.0 (s, Pt satellites <sup>3</sup>J<sub>Pt,C</sub> = 27.9 Hz, NCH<sub>2</sub>CH<sub>2</sub>P), 46.2 (s, Pt satellites <sup>3</sup>J<sub>Pt,C</sub> = 54.9 Hz, NCH<sub>2</sub>CH<sub>2</sub>N), 22.2 (m, NCH<sub>2</sub>CH<sub>2</sub>P); <sup>31</sup>P{<sup>1</sup>H} (162 MHz, DMSO-*d*<sub>6</sub>): δ = 4.3 (s, Pt satellites <sup>1</sup>J<sub>Pt,P</sub> = 2272 Hz, PPh), -144.2 (sept, PF<sub>6</sub>); MS (ESI): *m/z* (%) 660 (23, [**1**+H]<sup>+</sup>), 329 (100, [**1**-H]<sup>2+</sup>).

- 1 J. Kozelka, H.-P. Lüthi and E. Dubler, *Inorg. Chim. Acta*, 1984, **86**, 155–163.
- 2 (a) S. O. Grim, R. L. Keiter and W. McFarlane, *Inorg. Chem.*, 1967, **6**, 1133–1137; (b) H. C. Clark and J. D. Ruddick, *Inorg. Chem.*, 1970, **9**, 1226–1229.
- 3 O. Kaufhold, A. Flores-Figueroa, T. Pape and F. E. Hahn, *Organometallics*, 2009, **28**, 896–901.
